# Supplementary material
Source: Springer Nature journal article supplement (https://www.springermedizin.de/resource/supplementary/12881_2007_276_MOESM4_ESM.pdf/9452790)

Affected

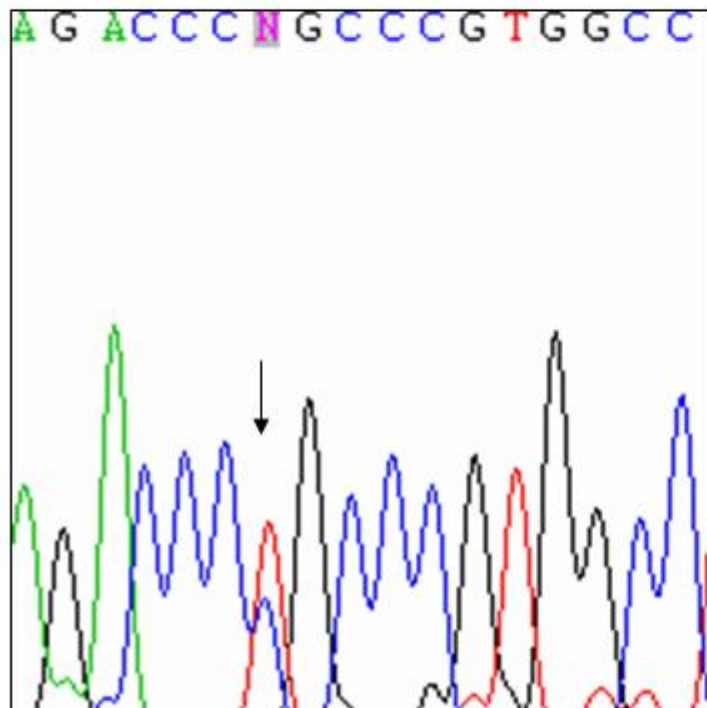

Normal

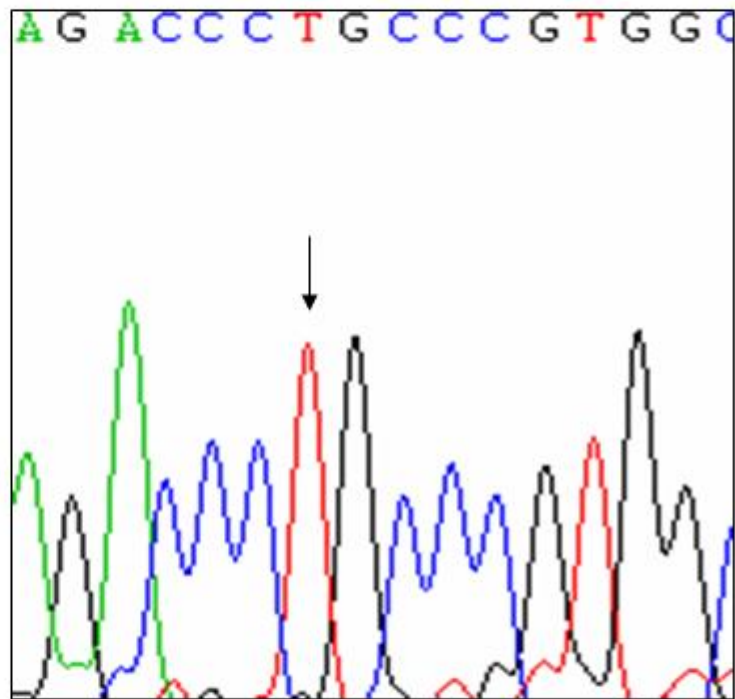

Supplement: MOESM4 [file 9452790]
